# Supplementary material
Source: publisher figshare collection journal article supplement (https://sage.figshare.com/ndownloader/files/20225364)
Supplement: Supplementary file 1 [file 20225364]

# Synthesis, Structures and Fluorescence Properties of One Novel Cobalt MOFs Based on a Tetraphenylethene(TPE)-core Ligand

Xiudian Xu, Yu Liang, Junfeng Li, Lei Zhou, Li-Zhuang Chen and Fang-Ming Wang\*

*School of Environmental and Chemical Engineering, Jiangsu University of Science and Technology, Zhenjiang 212003, P. R. China*

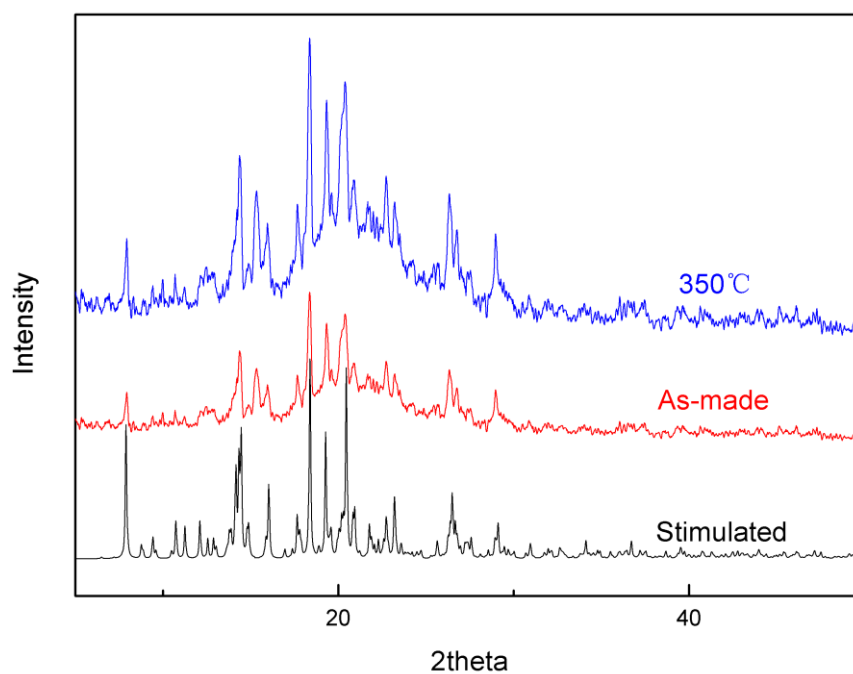

**Figure S1** PXRD curve of compound **1**

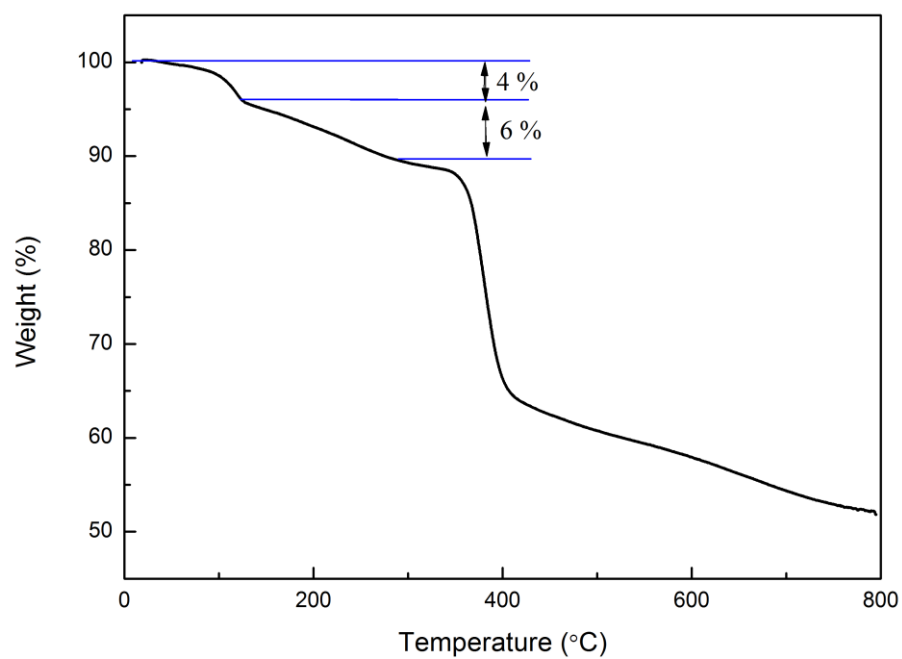

**Figure S2** TG curve of compound **1**

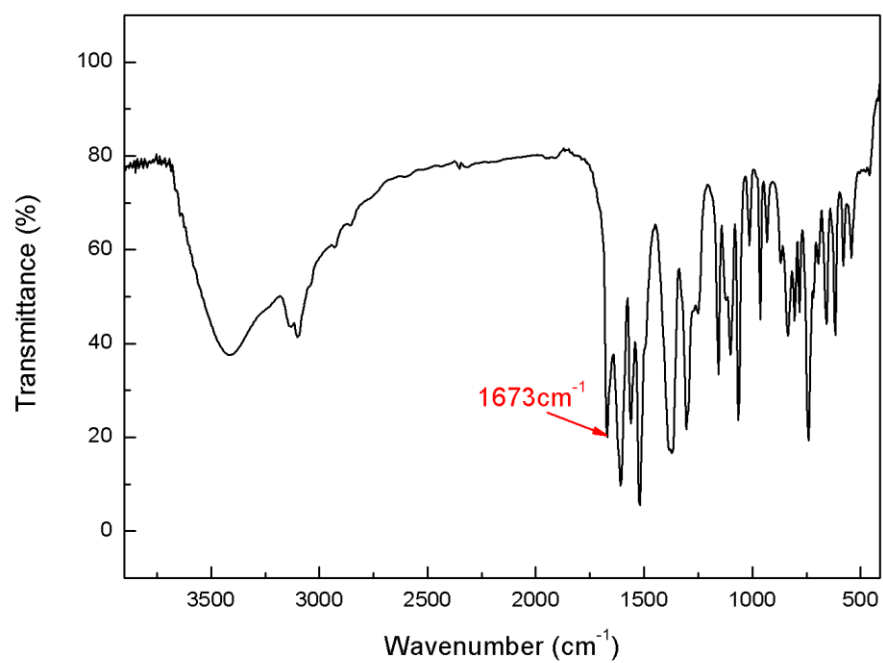

(a)

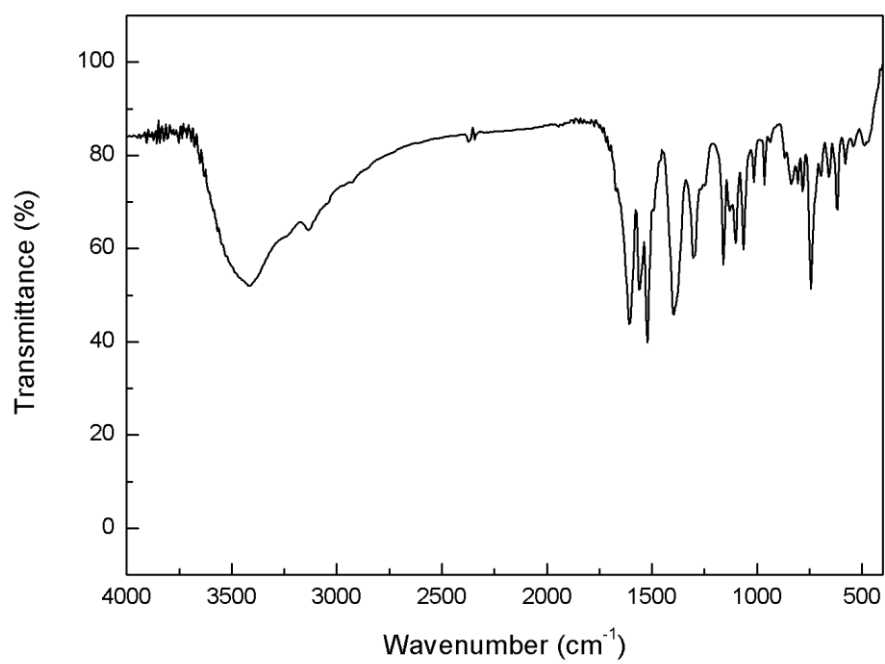

(b)

**Figure S3 (a)** Infrared spectra of compound **1**, **(b)** Infrared spectra of compound **1** after heated.
